# Supplementary material for: Glycoengineering of AAV-delivered monoclonal antibodies yields increased ADCC activity
Source: PubMed Central journal article supplement — Mol Ther Methods Clin Dev. 2020 Nov 11;20:204–17. doi: 10.1016/j.omtm.2020.11.001 (PMC7782200; doi:10.1016/j.omtm.2020.11.001), 2020-11-11
Supplement: mmc1.pdf [file mmc1.pdf]

**OMTM, Volume 20**

**Supplemental Information**

**Glycoengineering of AAV-delivered  
monoclonal antibodies yields  
increased ADCC activity**

**James M. Termini, José M. Martinez-Navio, Guangping Gao, Sebastian P. Fuchs, and Ronald C. Desrosiers**

Table S1: FUT8 shRNA Construct Sequences

| Construct   | Sequence                                                                                                                                                                                                                                                                                                                                                                                                                                                                                                                                                                                                                                                                                                                                                                                                                                                                                                                                                                                                                                       |
|-------------|------------------------------------------------------------------------------------------------------------------------------------------------------------------------------------------------------------------------------------------------------------------------------------------------------------------------------------------------------------------------------------------------------------------------------------------------------------------------------------------------------------------------------------------------------------------------------------------------------------------------------------------------------------------------------------------------------------------------------------------------------------------------------------------------------------------------------------------------------------------------------------------------------------------------------------------------------------------------------------------------------------------------------------------------|
| Construct 1 | <p>GTCGACGATCCATTGATTAGTGAACGGATCTCGACGGTATCGATCACGAGACTAGCCTCGAGCGGCCGCCCTTCACCGAGGGCCTATTTCCCATGATTCCTTCATATTTGCATATACGATACAAGGCTGTTAGAGAGATAATTGGAATTAATTTGACTGTAACACAAAGATATTAGTACAA AATACGTGACGTAGAAAAGTAATAATTTCTGGGTAGTTGCAGTTTTAAAATTATGTTTTAAAATGGACTATCATATGCTTACCGTAACCTTGAA AGTATTTGCGATTTCTGGCTTTATATATCTGTGAAAGGACGAAACACCGGGAACCTGGTTCAGCGGAGAATACTCGAGTATTCTCCGCTGAA CCAGTTCTTTTTGGTCATGTTCTTAATCGATACTAGTGTGTCAGTATTTAGCATGCCCAACCCATCTGCAAGGCATTCTGGATAGTGTCAAAC AGCCGGAATCAAGTCCGTTTATCTCAAACCTTAGCATTTTGGGAATAAATGATATTTGCTATGCTGGTTAAATTAGATTTTAGTTAAATTTCC TGCTGAAGCTCTAGTACGATAAGTAACCTGACCTAAGTGTAAAGTTGAGATTTCTTCAGGTTTTATATAGCTTGTGCGCCGCTGGGTACCTC CCGGCCACAGATGACCTTCTTTATCTCGAGATAAAGAAGGGTCATCTGTGTTTTTGGAAAGTCGAC</p>                                                                                                                                                                                                                                                                                           |
| Construct 2 | <p>GTCGACGATCCATTGATTAGTGAACGGATCTCGACGGTATCGATCACGAGACTAGCCTCGAGCGGCCGCCCTTCACCGAGGGCCTATTTCCCATGATTCCTTCATATTTGCATATACGATACAAGGCTGTTAGAGAGATAATTGGAATTAATTTGACTGTAACACAAAGATATTAGTACAA AATACGTGACGTAGAAAAGTAATAATTTCTGGGTAGTTGCAGTTTTAAAATTATGTTTTAAAATGGACTATCATATGCTTACCGTAACCTTGAA AGTATTTGCGATTTCTGGCTTTATATATCTGTGAAAGGACGAAACACCGGGAACCTGGTTCAGCGGAGAATACTCGAGTATTCTCCGCTGAA CCAGTTCTTTTTGGCAGCTTGTAAAACGACGGCCAGTGAATTCATATTTGCATGTCGCTATGTGTTCTGGGAAATCACCATAAACCTGAAATG TCTTTGGATTTGGGAATCTTAAGTTCTGTATGAGACCCTCGCCGGTCTATAATGACGGATCTAATGACGGATAGATCCGTCATTATAG ACTTTTTGGTCATGTTCTTAATCGATACTAGTGTGTCAGTATTTAGCATGCCCAACCCATCTGCAAGGCATTCTGGATAGTGTCAAACACGGC GAAATCAAGTCCGTTTATCTCAAACCTTAGCATTTTGGGAATAAATGATATTTGCTATGCTGGTTAAATTAGATTTTAGTTAAATTTCTGCTGA AGCTCTAGTACGATAAGTAACCTGACCTAAGTGTAAAGTTGAGATTTCTTCAGGTTTTATATAGCTTGTGCGCCGCTGGGTACCTCCCGGCC ACAGATGACCTTCTTTATCTCGAGATAAAGAAGGGTCATCTGTGTTTTTGGAAAGTCGAC</p>                                                                                                         |
| Construct 5 | <p>GTCGACGGATATTCACCATTATCGTTTCAGACCCACCTCCCAACCCGAGGGGACCCGACAGGCCCGAAGGAATAGAAGAAGAAGGTGGAG AGAGAGACAGAGACAGATCCATTGATTAGTGAACGGATCTCGACGGTATCGATCACGAGACTAGCCTCGAGCGGCCGCCCTTCACCGA GGGCCTATTTCCCATGATTCCTTCATATTTGCATATACGATACAAGGCTGTTAGAGAGATAATTGGAATTAATTTGACTGTAACACAAAGAT ATTAGTACAAAATACGTGACGTAGAAAAGTAATAATTTCTGGGTAGTTGCAGTTTTAAAATTATGTTTTAAAATGGACTATCATATGCTTACCGTACC GTAACCTGAAAGTATTTGATTTCTGGCTTTATATATCTGTGAAAGGACGAAACACCGGGAACCTGGTTCAGCGGAGAATACTCGAGTATT CTCCGCTGAACAGTTCTTTTTGGAAAGTCGAC</p>                                                                                                                                                                                                                                                                                                                                                                                                                                                                                                                         |
| Construct 6 | <p>GTCGACGATCCATTGATTAGTGAACGGATCTCGACGGTATCGATCACGAGACTAGCCTCGAGCGGCCGCCCTTCACCGAGGGCCTATTTCCCATGATTCCTTCATATTTGCATATACGATACAAGGCTGTTAGAGAGATAATTGGAATTAATTTGACTGTAACACAAAGATATTAGTACAA AATACGTGACGTAGAAAAGTAATAATTTCTGGGTAGTTGCAGTTTTAAAATTATGTTTTAAAATGGACTATCATATGCTTACCGTAACCTTGAA AGTATTTGCGATTTCTGGCTTTATATATCTGTGAAAGGACGAAACACCGGGAACCTGGTTCAGCGGAGAATACTCGAGTATTCTCCGCTGAA CCAGTTCTTTTTGAAGGATCTCAAGAAGATCCTTTGATCTTTTACGGGGTCTGACGCTCAGTGGAAACGAAACTCAGTTAAGGGATTTTGGTGCATGTTCTTAATCGATACTAGTGTGTCAGTATTTAGCATGCCCAACCCATCTGCAAGGCATTCTGGATAGTGTCAAACACGGCGAAATCA AGTCCGTTTATCTCAAACCTTAGCATTTTGGGAATAAATGATATTTGCTATGCTGGTTAAATTAGATTTTAGTTAAATTTCTGCTGAAGCTCTA GTACGATAAGTAACCTGACCTAAGTGTAAAGTTGAGATTTCTTCAGGTTTTATATAGCTTGTGCGCCGCTGGGTACCTCCCGGCCACAGATG ACCCTTCTTTATCTCGAGATAAAGAAGGGTCATCTGTGTTTTTGGAAAGTCGAC</p>                                                                                                                                                                                                            |
| Construct 7 | <p>GTCGACGATCCATTGATTAGTGAACGGATCTCGACGGTATCGATCACGAGACTAGCCTCGAGCGGCCGCCCTTCACCGAGGGCCTATTTCCCATGATTCCTTCATATTTGCATATACGATACAAGGCTGTTAGAGAGATAATTGGAATTAATTTGACTGTAACACAAAGATATTAGTACAA AATACGTGACGTAGAAAAGTAATAATTTCTGGGTAGTTGCAGTTTTAAAATTATGTTTTAAAATGGACTATCATATGCTTACCGTAACCTTGAA AGTATTTGCGATTTCTGGCTTTATATATCTGTGAAAGGACGAAACACCGGGAACCTGGTTCAGCGGAGAATACTCGAGTATTCTCCGCTGAA CCAGTTCTTTTTGGATGTGCTGCAAGGCGATTAAGTTGGGTAACGCCAGGGTTTTCCAGTACGACGTTGTAACGACGGCCAGTGAATT CATATTTGCATGTCGCTATGTGTTCTGGGAAATCACCATAAACCTGAAATGCTTTGGATTTGGGAATCTTATAAGTTCTGTATGAGACCACTC GCCGGTCTATAATGACGGATCTAATCTGAGTATAGATCCGTCATTATAGACTTTTTGCTACGGGGTCTGACGCTCAGTGGAAACGAAAACCTC ACGTTAAGGGATTTTGGTCATGTTCTTAATCGATACTAGTGTGTCAGTATTTAGCATGCCCAACCCATCTGCAAGGCATTCTGGATAGTGTCA AAACACGGCGAAATCAAGTCCGTTTATCTCAAACCTTAGCATTTTGGGAATAAATGATATTTGCTATGCTGGTTAAATTAGATTTTAGTTAAAT TTCCTGCTGAAGCTCTAGTACGATAAGTAACCTGACCTAAGTGTAAAGTTGAGATTTCTTCAGGTTTTATATAGCTTGTGCGCCGCTGGGTA CCTCCCGGCCACAGATGACCTTCTTTATCTCGAGATAAAGAAGGGTCATCTGTGTTTTTGGAAAGTCGAC</p> |
